# Supplementary material for: Complex isomerism influencing the textural properties of organometallic [Cu(salen)] porous polymers: paramagnetic solid-state NMR characterization and heterogeneous catalysis
Source: Royal Society of Chemistry journal article supplement (doi:10.1039/d4dt01305k), 2024-01-01
Supplement: d4dt01305k1.pdf [file d4dt01305k1.pdf]

## Electronic supplementary information (ESI)

### Complex Isomerism Influencing the Texture Properties of Organometallic [Cu(salen)] Porous Polymers: Paramagnetic Solid-State NMR Characterization and Heterogeneous Catalysis

David Šorm<sup>a\*</sup>, Jan Blahut<sup>b\*</sup>, Bogdana Bashta<sup>a</sup>, Ivana Císařová<sup>c</sup>, Eva Vrbková<sup>d</sup>, Eliška Vyskočilová<sup>d</sup> and Jan Sedláček<sup>a</sup>

<sup>a</sup> Department of Physical and Macromolecular Chemistry, Faculty of Science, Charles University, Hlavova 2030, Prague 2, 128 43, Czech Republic

<sup>b</sup> Institute of Organic Chemistry and Biochemistry of the Czech Academy of Sciences, Flemingovo náměstí 542/2, Prague 6, 160 00, Czech Republic

<sup>c</sup> Department of Inorganic Chemistry, Faculty of Science, Charles University, Hlavova 2030, Prague 2, 128 43, Czech Republic

<sup>d</sup> Department of Organic Technology, University of Chemistry and Technology Prague, Technická 5, Prague 6, 166 28, Czech Republic

\*corresponding authors

#### L1:

(1*S*,2*S*)-*N,N'*-bis(5-ethynylsalicylidene)-1,2-diaminocyclohexane

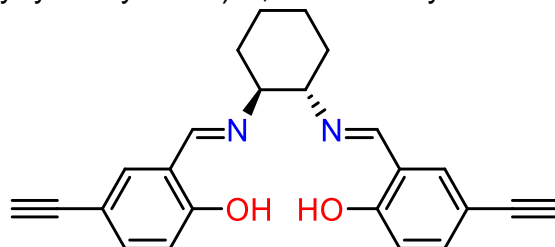

Figure S1: Structure of the ligand L1

<sup>1</sup>H NMR (400 MHz, CD<sub>2</sub>Cl<sub>2</sub>) δ 13.52 (s, 2H), 8.25 (s, 2H), 7.37 (d, *J* = 2.1 Hz, 2H), 7.34 (s, 2H), 6.82 (d, *J* = 8.7 Hz, 2H), 3.38 – 3.29 (m, 2H), 3.00 (s, 2H), 2.00 – 1.81 (m, 2H), 1.79 – 1.65 (m, 2H), 1.57 – 1.43 (m, 4H).

<sup>13</sup>C NMR (101 MHz, CD<sub>2</sub>Cl<sub>2</sub>) δ 164.36, 162.08, 136.13, 135.73, 118.95, 117.57, 112.46, 83.27, 75.88, 72.86, 33.30, 24.52.

HR-MS ESI, measured (calculated) *m/z* of M+H adduct: 371.174411 (371.175404), C<sub>24</sub>H<sub>23</sub>N<sub>2</sub>O<sub>2</sub>

L2:

*trans-N,N'*-bis(5-ethynylsalicylidene)-1,2-diaminocyclohexane

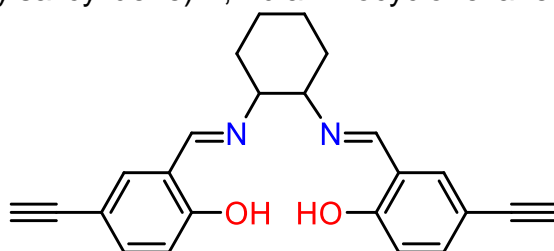

**Figure S2:** Structure of the ligand **L2**

$^1\text{H}$  NMR (400 MHz,  $\text{CD}_2\text{Cl}_2$ )  $\delta$  13.52 (s, 2H), 8.25 (s, 2H), 7.37 (d,  $J = 2.1$  Hz, 2H), 7.34 (s, 2H), 6.82 (d,  $J = 8.8$  Hz, 2H), 3.40 – 3.33 (m, 2H), 3.00 (s, 2H), 1.98 – 1.85 (m, 2H), 1.79 – 1.65 (m, 2H), 1.56 – 1.44 (m, 4H).

$^{13}\text{C}$  NMR (101 MHz,  $\text{CD}_2\text{Cl}_2$ )  $\delta$  164.36, 162.08, 136.13, 135.73, 118.95, 117.57, 112.46, 83.27, 75.88, 72.85, 33.30, 24.52.

HR-MS ESI, measured (calculated)  $m/z$  of  $\text{M}+\text{H}$  adduct: 371.174846 (371.175404),  $\text{C}_{24}\text{H}_{23}\text{N}_2\text{O}_2$

L3:

*cis-N,N'*-bis(5-ethynylsalicylidene)-1,2-diaminocyclohexane

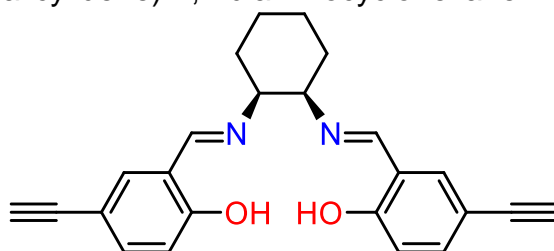

**Figure S3:** Structure of the ligand **L3**

$^1\text{H}$  NMR (400 MHz,  $\text{CD}_2\text{Cl}_2$ )  $\delta$  13.76 (s, 2H), 8.33 (s, 2H), 7.46 – 7.37 (m, 4H), 6.86 (d,  $J = 8.4$  Hz, 2H), 3.66 – 3.58 (m, 2H), 3.03 (s, 2H), 2.02 – 1.73 (m, 4H), 1.67 – 1.51 (m, 4H).

$^{13}\text{C}$  NMR (101 MHz,  $\text{CD}_2\text{Cl}_2$ )  $\delta$  164.00, 162.40, 136.23, 135.74, 119.10, 117.77, 112.37, 83.38, 75.88, 69.76, 31.10, 22.74.

HR-MS ESI, measured (calculated)  $m/z$  of  $\text{M}+\text{H}$  adduct: 371.174930 (371.175404),  $\text{C}_{24}\text{H}_{23}\text{N}_2\text{O}_2$

L1

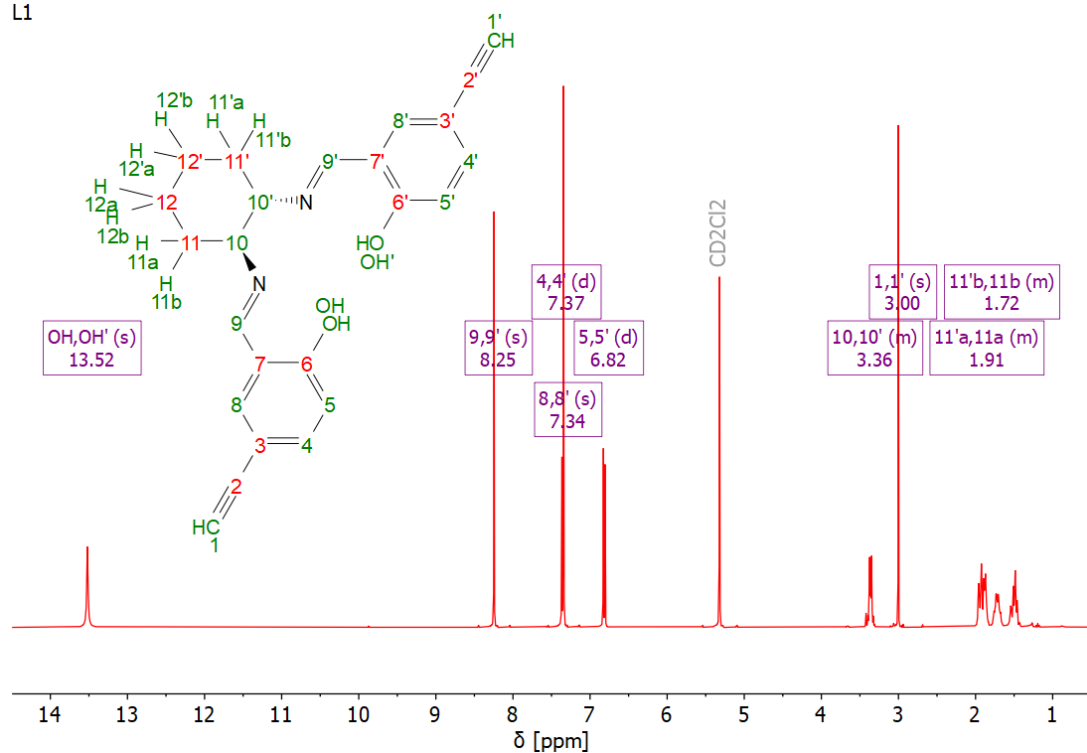

Figure S4: <sup>1</sup>H NMR spectrum of L1 ligand

L1

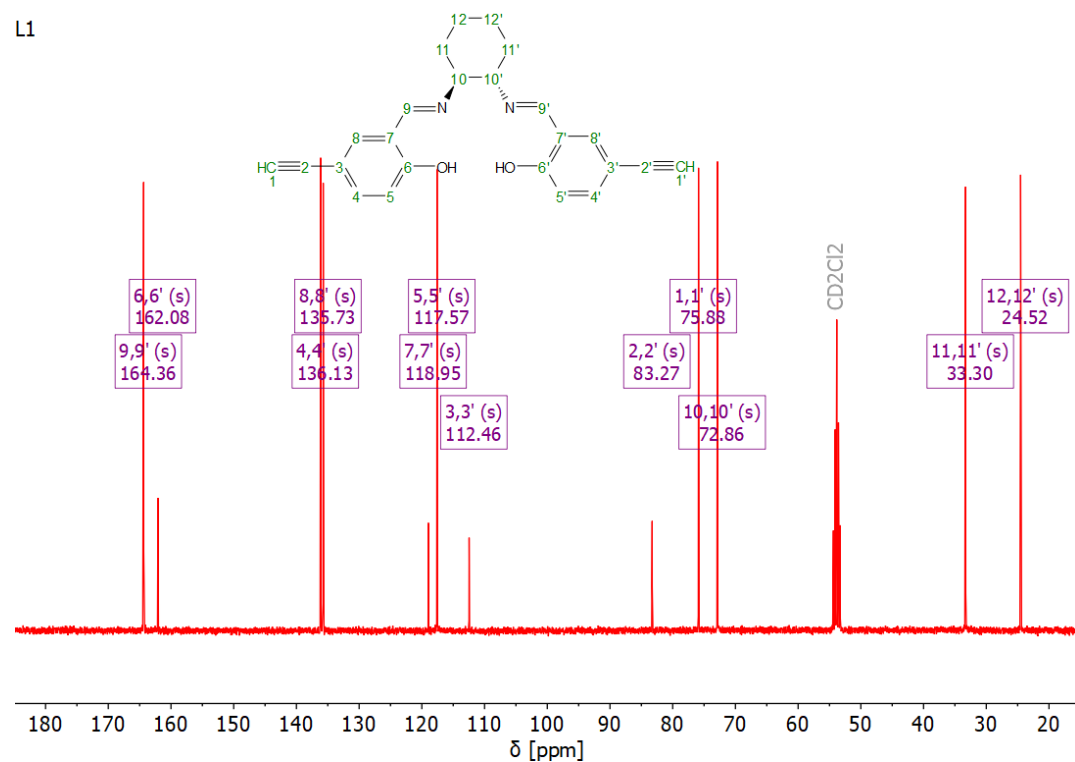

Figure S5: <sup>13</sup>C{<sup>1</sup>H} NMR spectrum of L1 ligand

L2

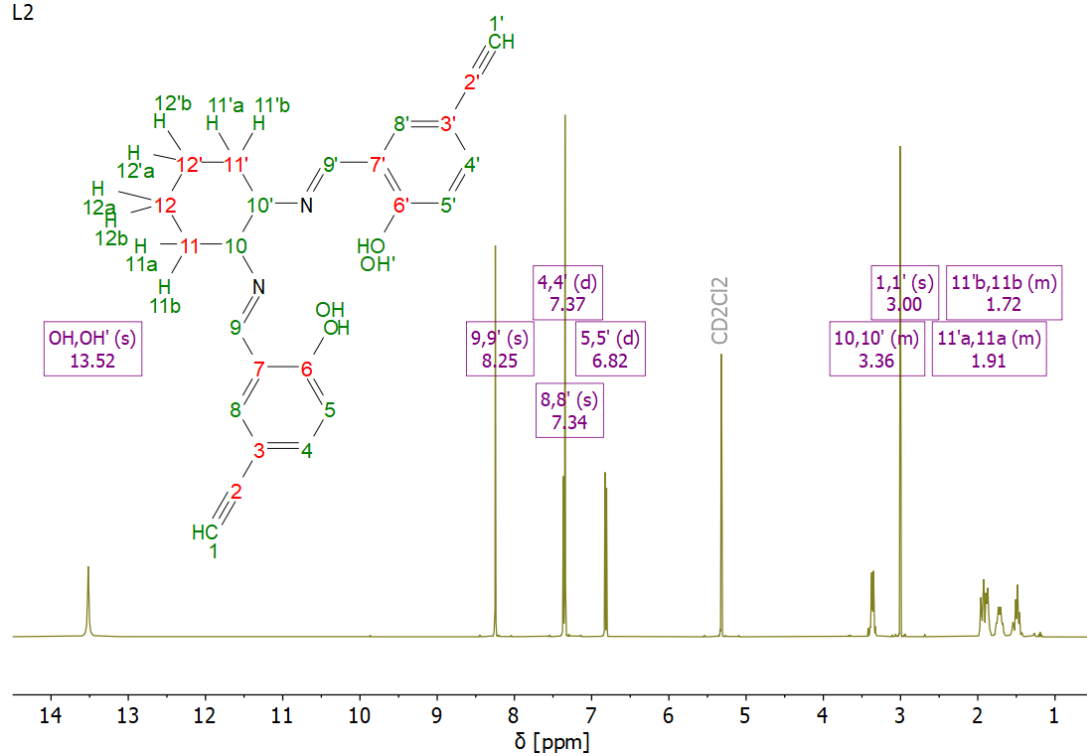

Figure S6:  $^1\text{H}$  NMR spectrum of L2 ligand

L2

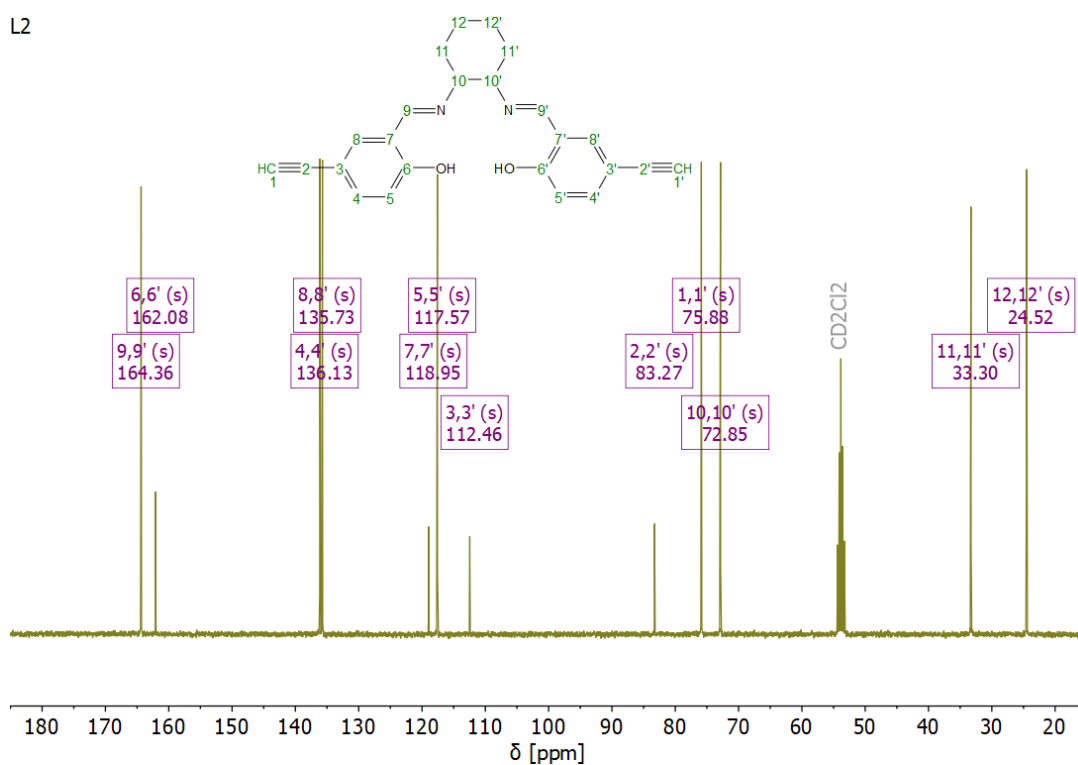

Figure S7:  $^{13}\text{C}\{^1\text{H}\}$  NMR spectrum of L2 ligand

L3

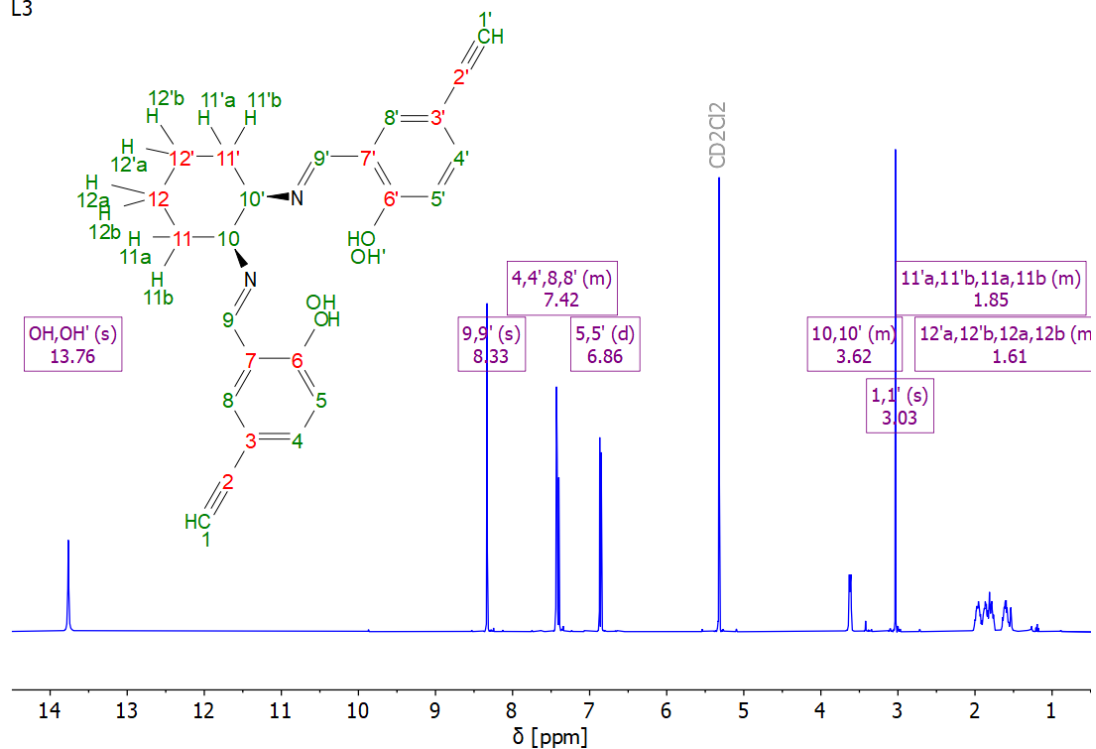Figure S8:  $^1\text{H}$  NMR spectrum of L3 ligand

L3

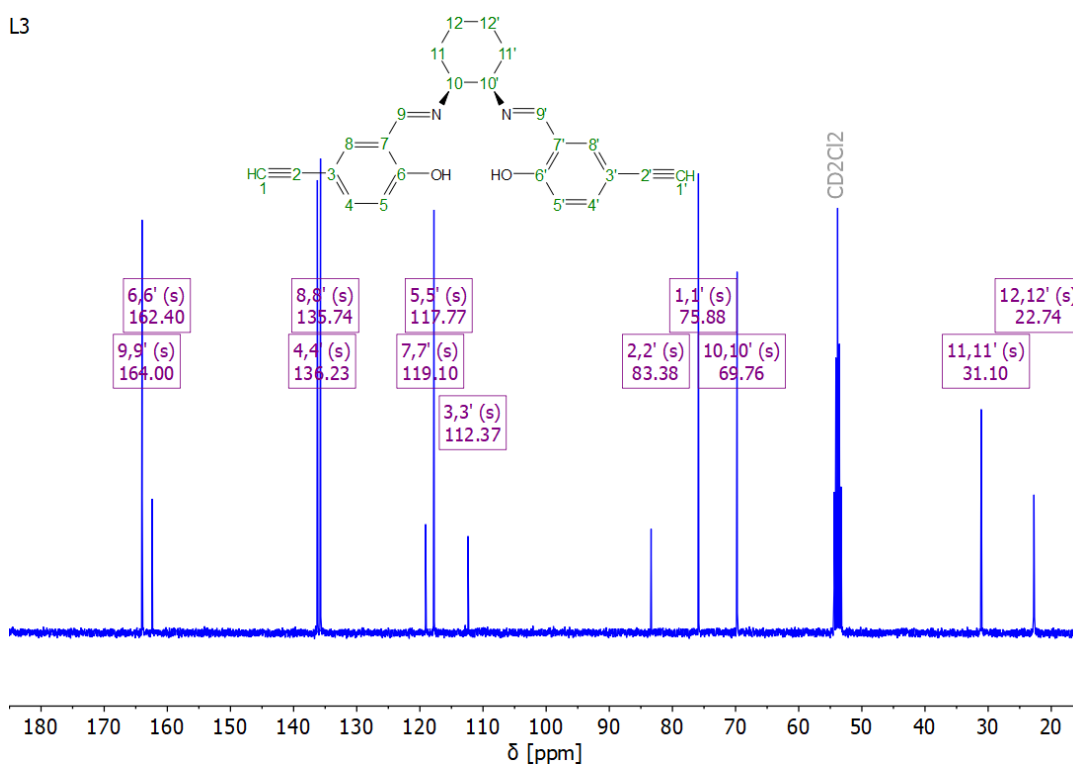Figure S9:  $^{13}\text{C}\{^1\text{H}\}$  NMR spectrum of L3 ligand

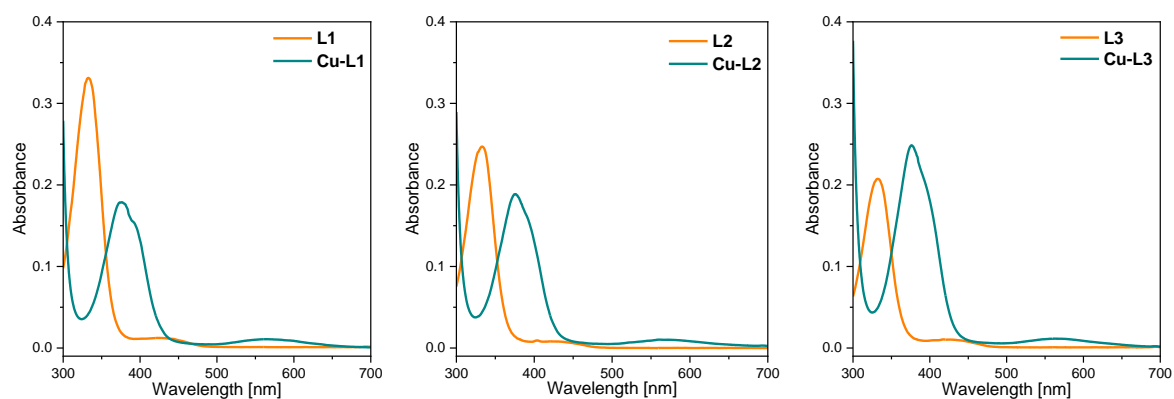

**Figure S10:** UV/VIS spectra of ligands (**L1**, **L2** and **L3**) and complexes (**Cu-L1**, **Cu-L2** and **Cu-L3**)

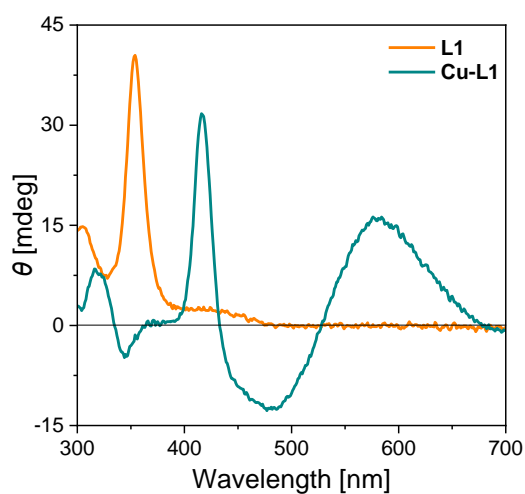

**Figure S11:** Circular dichroism (CD) spectra of ligand **L1** and complex **Cu-L1**.

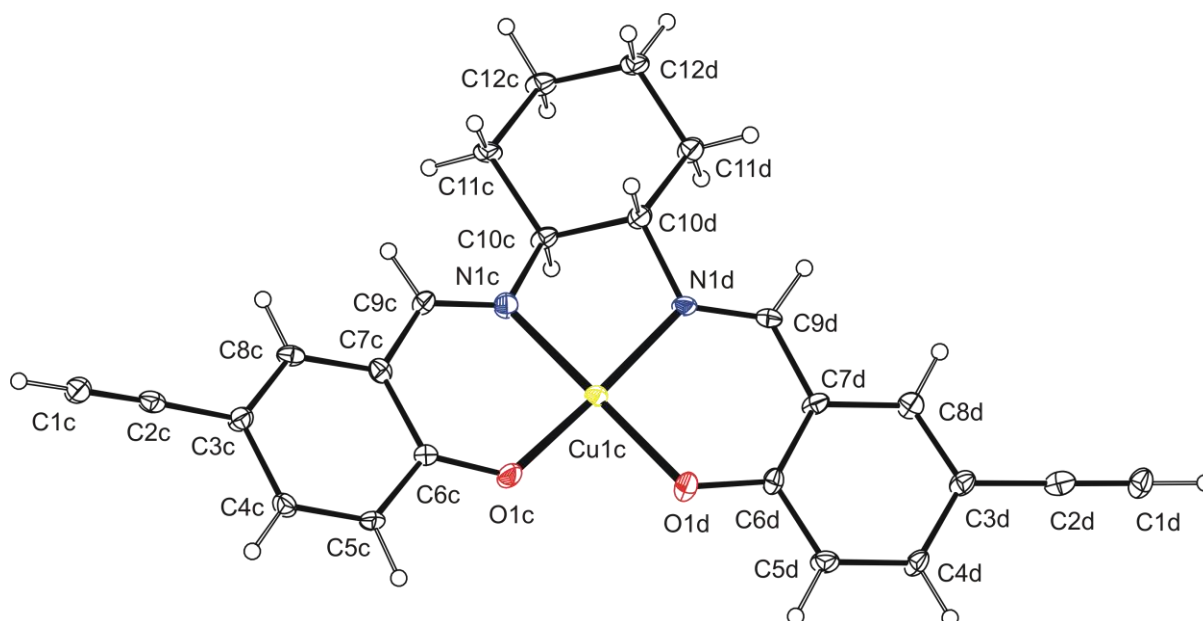

**Figure S12:** View on the one of two symmetrically independent molecule of **Cu-L1** with the atom numbering schema, the displacement ellipsoids are drawn at 50% probability level.

Crystal data for **Cu-L1**:  $C_{24}H_{20}CuN_2O_2 \cdot C_3H_7NO$ ,  $M_r = 505.05$ ; Monoclinic,  $P2_1$ , (No 4),  $a = 8.6380$  (3) Å,  $b = 31.0524$  (10) Å,  $c = 8.6749$  (3) Å,  $\beta = 90.667$  (2),  $V = 2326.72$

(14)  $\text{\AA}^3$ ,  $Z = 4$ ,  $D_x = 1.442 \text{ Mg m}^{-3}$ , brown plate of dimensions  $0.28 \times 0.16 \times 0.03 \text{ mm}$ , multi-scan absorption correction ( $\mu = 1.61 \text{ mm}^{-1}$ )  $T_{\min} = 0.79$ ,  $T_{\max} = 0.96$ ; a total of 24115 measured reflections ( $\theta_{\max} = 68.4^\circ$ ), from which 8359 were unique ( $R_{\text{int}} = 0.050$ ) and 7893 observed according to the  $I > 2\sigma(I)$  criterion. The refinement converged ( $\Delta/\sigma_{\max} = 0.001$ ) to  $R = 0.061$  for observed reflections and  $wR(F^2) = 0.143$ ,  $GOF = 1.16$  for 617 parameters and all 8359 reflections. The final difference map displayed no peaks of chemical significance ( $\Delta\rho_{\max} = 0.60$ ,  $\Delta\rho_{\min} -0.88 \text{ e.\AA}^{-3}$ ).

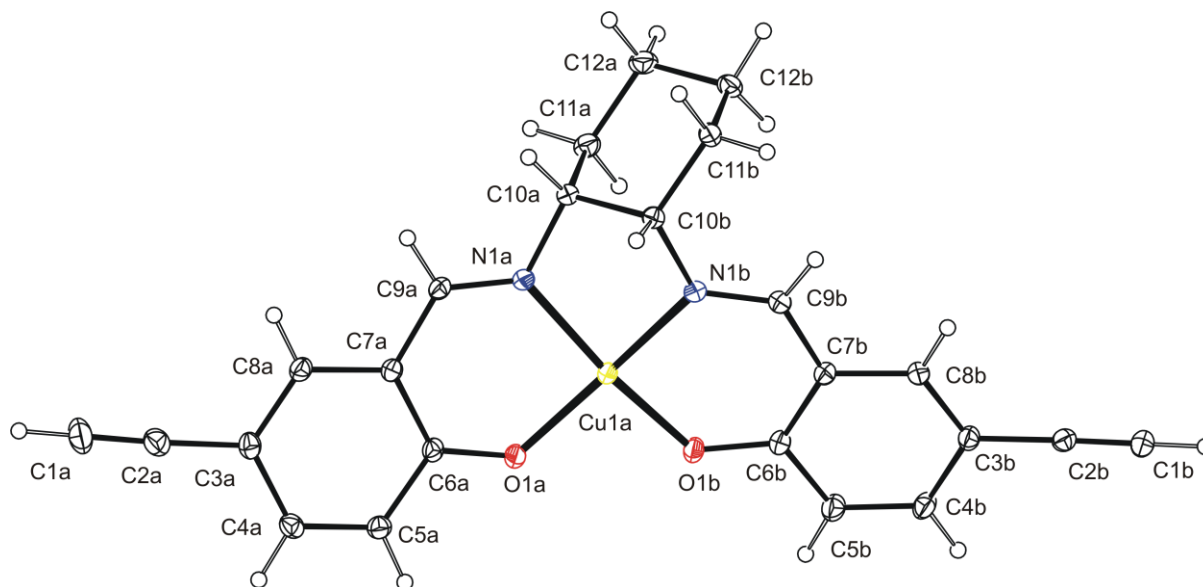

**Figure S13:** View on molecule of **Cu-L3** with the atom numbering schema, the displacement ellipsoids are drawn at 50% probability level.

Crystal data for **Cu-L3**:  $\text{C}_{24}\text{H}_{20}\text{CuN}_2\text{O}_2$ ,  $M_r = 431.96$ ; Monoclinic,  $P2_1/n$ , (No 14),  $a = 14.1633 (10) \text{ \AA}$ ,  $b = 9.0797 (7) \text{ \AA}$ ,  $c = 16.0469 (11) \text{ \AA}$ ,  $\beta = 112.615 (2)$ ,  $V = 1904.9 (2) \text{ \AA}^3$ ,  $Z = 4$ ,  $D_x = 1.506 \text{ Mg m}^{-3}$ , green prism of dimensions  $0.25 \times 0.10 \times 0.07 \text{ mm}$ , multi-scan absorption correction ( $\mu = 1.81 \text{ mm}^{-1}$ )  $T_{\min} = 0.77$ ,  $T_{\max} = 0.89$ ; a total of 57728 measured reflections ( $\theta_{\max} = 77.5^\circ$ ), from which 4036 were unique ( $R_{\text{int}} = 0.031$ ) and 3854 observed according to the  $I > 2\sigma(I)$  criterion. The refinement converged ( $\Delta/\sigma_{\max} = 0.001$ ) to  $R = 0.032$  for observed reflections and  $wR(F^2) = 0.088$ ,  $GOF = 1.04$  for 262 parameters and all 4036 reflections. The final difference map displayed no peaks of chemical significance ( $\Delta\rho_{\max} = 0.67$ ,  $\Delta\rho_{\min} -0.70 \text{ e.\AA}^{-3}$ ).

X-ray crystallographic data have been deposited with the Cambridge Crystallographic Data Centre (CCDC) under deposition number 2333975 and 2333976 for **Cu-L1** and **Cu-L3**, respectively and can be obtained free of charge from the Centre via its website (<https://www.ccdc.cam.ac.uk/structures/>).

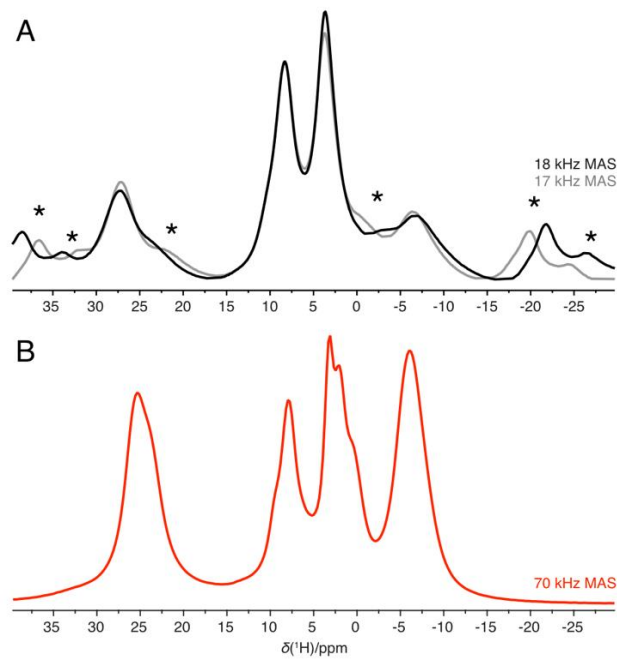

**Figure S14:** Comparison of slow and fast MAS  $^1\text{H}$  NMR spectra of **Cu-L1**.

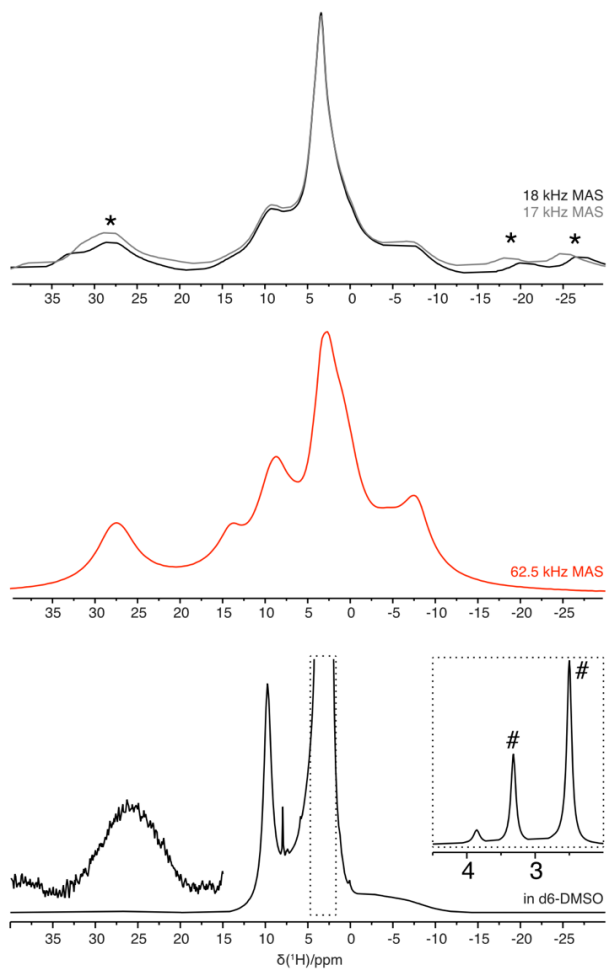

**Figure S15:** Comparison of slow and fast MAS  $^1\text{H}$  NMR spectra of **Cu-L3** and solution  $^1\text{H}$  NMR spectra of **Cu-L3**.



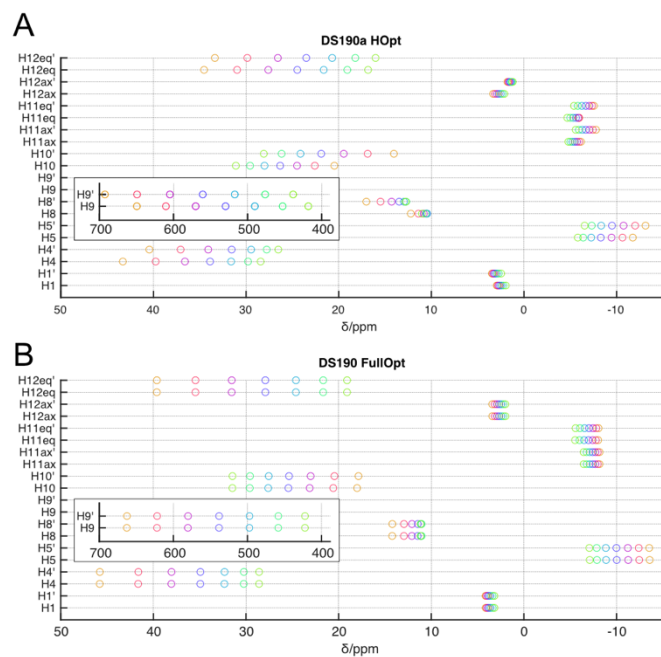

**Figure S16:**  $^1\text{H}$  NMR shifts of **Cu-L1** predicted by calculations for X-ray based geometry with refined  $^1\text{H}$  positions (A) and fully optimized geometry in COSMO/ $\text{CHCl}_3$  solvent model (B) calculated for range of HFX admixture (from orange 10% for green 40% in 5% steps) (298 K).

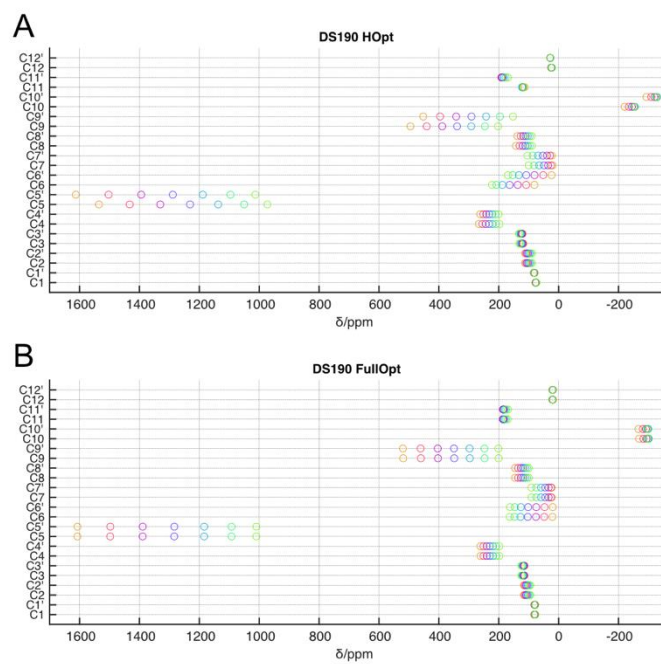

**Figure S17:**  $^{13}\text{C}$  NMR shifts of **Cu-L1** predicted by calculations for X-ray based geometry with refined  $^1\text{H}$  positions (A) and fully optimized geometry in COSMO/ $\text{CHCl}_3$  solvent model (B) calculated for range of HFX admixture (from orange 10% for green 40% in 5% steps) (298 K).

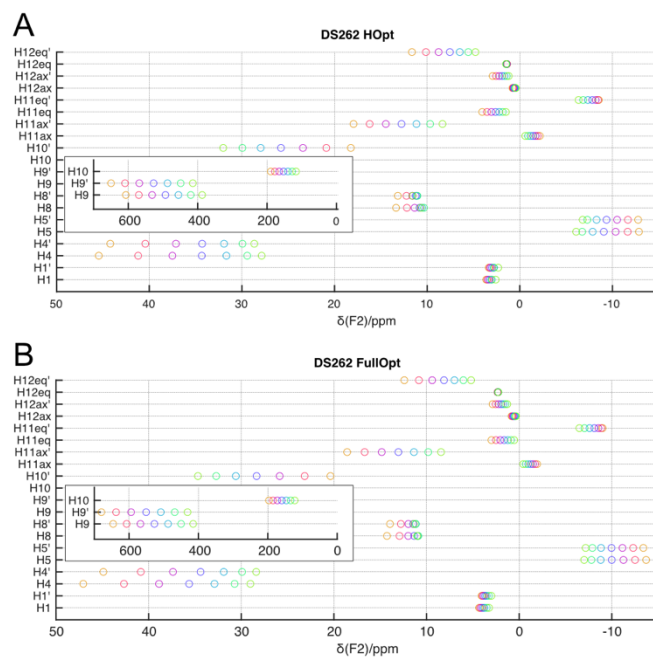

**Figure S18:**  $^1\text{H}$  NMR shifts of **Cu-L3** predicted by calculations for X-ray based geometry with refined  $^1\text{H}$  positions (A) and fully optimized geometry in COSMO/ $\text{CHCl}_3$  solvent model (B) calculated for range of HFx admixture (from orange 10% for green 40% in 5% steps) (298 K).

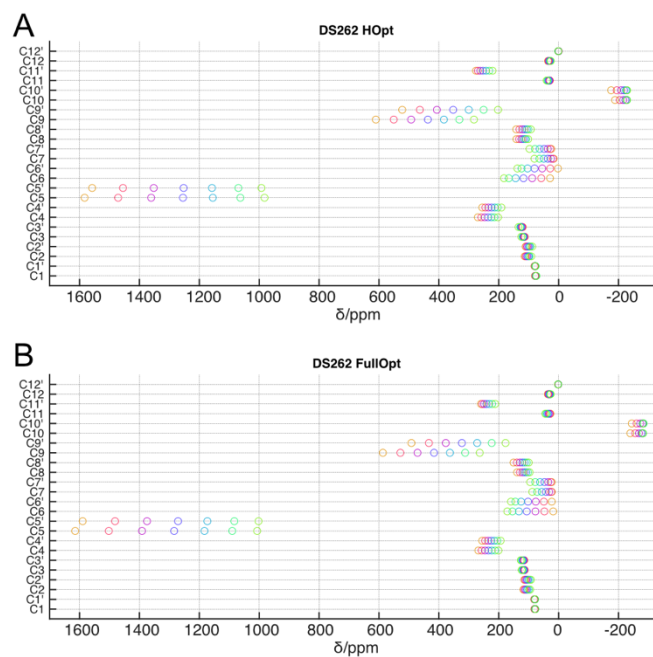

**Figure S19:**  $^{13}\text{C}$  NMR shifts of **Cu-L3** predicted by calculations for X-ray based geometry with refined  $^1\text{H}$  positions (A) and fully optimized geometry in COSMO/ $\text{CHCl}_3$  solvent model (B) calculated for range of HFx admixture (from orange 10% for green 40% in 5% steps) (298 K).

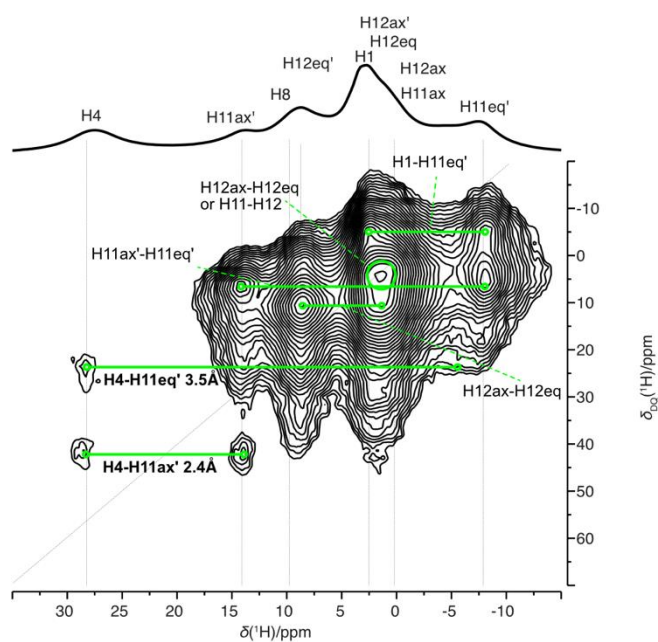

**Figure S20:** Homonuclear BaBa16  $^1\text{H}$  single-double quantum (SQ-DQ) correlation of **Cu-L3**.

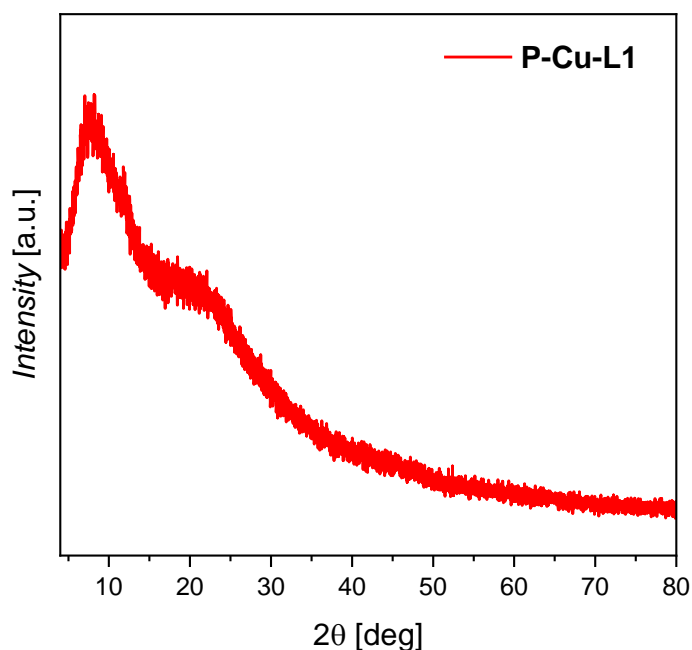

**Figure S21:** Powder X-Ray Diffraction (pXRD) pattern of network **P-Cu-L1**.

**Powder X-ray Diffraction (XRD)** pattern was collected using a high-resolution Explorer diffractometer (GNR Analytical Instruments, Italy) equipped with a one-dimensional Mythen 1K silicon strip detector (Dectris, Switzerland). A Cu X-Ray tube (wavelength  $\lambda = 1.54 \text{ \AA}$ ) operated at 40 kV and 30 mA and monochromatized with Ni foil ( $\beta$  filter) was used. Measurements were performed in the  $2\theta$  range of  $5 - 80^\circ$  with a  $0.1^\circ$  step and 15 s exposure time at each step.

**Table S1:** Observed  $^1\text{H}$  and  $^{13}\text{C}$  NMR shift from HSQC-TEDOR experiment of **Cu-L1** a related calculated value for 10%, 25% and 40% of Hartee-Fock exchange admixture (at 298 K) and for various temperature 298 K and 323 K (using 25% HFX), as well as decomposition of calculated NMR shift (298 K, 25% HFX) to orbital shift ( $\delta_{dia,K} = \sigma_{ref} - \sigma_{dia,K}$ ), Fermi contact ( $\sigma_{FC}$ ) and spin-dipolar ( $\sigma_{SD}$ ) shielding. All values listed in ppm, for atom label see Scheme 1.

|       | $\delta_{exp}$ | $\delta_{calc}^{10\%}$ | $\delta_{calc}^{25\%}$ | $\delta_{calc}^{40\%}$ | $\delta_{calc}^{298K}$ | $\delta_{calc}^{323K}$ | $\delta_{dia,K}$ | $\sigma_{FC}$ | $\sigma_{SD}$ |
|-------|----------------|------------------------|------------------------|------------------------|------------------------|------------------------|------------------|---------------|---------------|
| H1    | 3.9            | 4.13                   | 3.77                   | 3.18                   | 3.77                   | 3.70                   | 2.81             | -1.01         | 0.05          |
| H4    | 24.5           | 45.79                  | 34.93                  | 28.59                  | 34.93                  | 32.82                  | 7.76             | -27.36        | 0.20          |
| H5    | ND             | -13.55                 | -10.00                 | -7.08                  | -10.00                 | -8.68                  | 7.14             | 16.51         | 0.63          |
| H8    | 8.9            | 14.21                  | 11.47                  | 11.15                  | 11.47                  | 11.16                  | 7.54             | -4.24         | 0.31          |
| H9    | ND             | 662.79                 | 538.35                 | 422.32                 | 538.35                 | 497.34                 | 8.31             | -530.81       | 0.77          |
| H10   | ND             | 17.93                  | 25.39                  | 31.47                  | 25.39                  | 23.67                  | 3.14             | -22.44        | 0.19          |
| H11ax | -5.8           | -8.16                  | -7.43                  | -6.45                  | -7.43                  | -6.76                  | 1.24             | 8.34          | 0.32          |
| H11eq | -5.8           | -8.04                  | -7.00                  | -5.55                  | -7.00                  | -6.27                  | 2.48             | 9.02          | 0.46          |
| H12ax | 1.6            | 3.42                   | 2.66                   | 2.00                   | 2.66                   | 2.56                   | 1.36             | -1.48         | 0.18          |
| H12eq | 25.0           | 39.63                  | 27.91                  | 19.09                  | 27.91                  | 25.91                  | 2.02             | -26.09        | 0.19          |
| C1    | 80.4           | 81.5                   | 78.8                   | 77.8                   | 78.8                   | 79.0                   | 82.08            | 3.14          | 0.17          |
| C2    | Q              | 115.9                  | 105.9                  | 94.4                   | 105.9                  | 104.7                  | 90.16            | -15.85        | 0.10          |
| C3    | Q              | 114.1                  | 117.4                  | 124.3                  | 117.4                  | 117.2                  | 114.34           | -3.44         | 0.38          |
| C4    | 214            | 261.0                  | 229.8                  | 198.2                  | 229.8                  | 223.6                  | 149.74           | -81.55        | 1.52          |
| C5    | ND             | 1607.0                 | 1283.6                 | 1009.5                 | 1283.6                 | 1194.4                 | 131.63           | -1153.34      | 1.41          |
| C6    | Q              | 20.2                   | 102.4                  | 162.9                  | 102.4                  | 108.5                  | 180.85           | 74.40         | 4.04          |
| C7    | Q              | 23.2                   | 44.8                   | 90.8                   | 44.8                   | 51.0                   | 125.66           | 78.53         | 2.37          |
| C8    | 99             | 145.7                  | 118.4                  | 99.9                   | 118.4                  | 120.9                  | 150.85           | 31.31         | 1.12          |
| C9    | NA             | 519.6                  | 349.0                  | 200.9                  | 349.0                  | 335.3                  | 170.89           | -184.00       | 5.84          |
| C10   | NA             | -267.7                 | -298.4                 | -296.2                 | -298.4                 | -269.7                 | 71.59            | 367.18        | 2.77          |
| C11   | 162            | 184.0                  | 183.7                  | 169.4                  | 183.7                  | 171.9                  | 31.57            | -153.36       | 1.27          |
| C12   | 24             | 19.2                   | 20.7                   | 21.3                   | 20.7                   | 21.2                   | 27.85            | 6.76          | 0.40          |

ND – not detected signal, Q - quaternary carbon

**Table S2:** Observed  $^1\text{H}$  and  $^{13}\text{C}$  NMR shift from HSQC-TEDOR experiment of **Cu-L3** a related calculated value for 10%, 25% and 40% of Hartee-Fock exchange admixture (at 298 K) and for various temperature 298 K and 323 K (using 25% HFX), as well as decomposition of calculated NMR shift (298 K, 25% HFX) to orbital shift ( $\delta_{dia,K} = \sigma_{ref} - \sigma_{dia,K}$ ), Fermi contact ( $\sigma_{FC}$ ) and spin-dipolar ( $\sigma_{SD}$ ) shielding. All values listed in ppm, for atom label see Scheme 1.

| Values in ppm: | $\delta_{exp}$ | $\delta_{calc}^{10\%}$ | $\delta_{calc}^{25\%}$ | $\delta_{calc}^{40\%}$ | $\delta_{calc}^{298K}$ | $\delta_{calc}^{323K}$ | $\delta_{dia,K}$ | $\sigma_{FC}$ | $\sigma_{SD}$ |
|----------------|----------------|------------------------|------------------------|------------------------|------------------------|------------------------|------------------|---------------|---------------|
| H1             | 2.7            | 4.32                   | 3.90                   | 3.26                   | 3.90                   | 3.82                   | 2.81             | -1.14         | 0.05          |
| H1'            | 2.7            | 4.05                   | 3.67                   | 3.01                   | 3.67                   | 3.61                   | 2.82             | -0.90         | 0.05          |
| H4             | 27.5           | 47.06                  | 35.63                  | 29.02                  | 35.63                  | 33.47                  | 7.76             | -28.06        | 0.19          |
| H4'            | 28.5           | 44.89                  | 34.39                  | 28.39                  | 34.39                  | 32.33                  | 7.77             | -26.83        | 0.21          |
| H5             | ND             | -13.70                 | -9.99                  | -7.01                  | -9.99                  | -8.67                  | 7.13             | 16.50         | 0.62          |
| H5'            | ND             | -13.41                 | -9.97                  | -7.17                  | -9.97                  | -8.64                  | 7.15             | 16.46         | 0.65          |
| H8             | 9.5            | 14.27                  | 11.34                  | 11.02                  | 11.34                  | 11.04                  | 7.52             | -4.12         | 0.30          |
| H8'            | 9.5            | 13.95                  | 11.44                  | 11.36                  | 11.44                  | 11.14                  | 7.55             | -4.22         | 0.33          |
| H9             | ND             | 645.79                 | 526.92                 | 415.16                 | 526.92                 | 486.79                 | 8.22             | -519.47       | 0.76          |
| H9'            | ND             | 679.57                 | 550.72                 | 431.41                 | 550.72                 | 508.77                 | 8.37             | -543.14       | 0.79          |
| H10            | ND             | 196.70                 | 159.64                 | 122.54                 | 159.64                 | 147.53                 | 3.15             | -157.47       | 0.98          |
| H10'           | ND             | 20.38                  | 28.35                  | 34.68                  | 28.35                  | 26.45                  | 3.84             | -24.76        | 0.26          |
| H11ax          | -8.0           | -1.93                  | -1.25                  | -0.43                  | -1.25                  | -0.99                  | 2.08             | 4.48          | -1.15         |
| H11ax'         | 13.6           | 18.57                  | 13.04                  | 8.44                   | 13.04                  | 12.15                  | 1.55             | -11.91        | 0.42          |
| H11eq          | 0.8            | 2.99                   | 1.62                   | 0.54                   | 1.62                   | 1.62                   | 1.61             | 0.26          | -0.26         |
| H11eq'         | 0.8            | -9.01                  | -8.11                  | -6.50                  | -8.11                  | -7.29                  | 2.58             | 10.19         | 0.51          |
| H12ax          | 0.8            | 0.83                   | 0.57                   | 0.35                   | 0.57                   | 0.63                   | 1.36             | 0.67          | 0.12          |
| H12ax'         | 1.1            | 2.88                   | 1.94                   | 1.29                   | 1.94                   | 1.89                   | 1.30             | -0.72         | 0.07          |
| H12eq          | 0.8            | 2.34                   | 2.29                   | 2.26                   | 2.29                   | 2.25                   | 1.82             | -0.37         | -0.09         |
| H12eq'         | 8.5            | 12.40                  | 8.12                   | 5.19                   | 8.12                   | 7.60                   | 1.41             | -6.83         | 0.12          |
| C1             | 85.3           | 81.2                   | 78.5                   | 77.7                   | 78.5                   | 78.8                   | 82.2             | 3.5           | 0.2           |

|      |      |        |        |        |        |        |       |         |      |
|------|------|--------|--------|--------|--------|--------|-------|---------|------|
| C1'  | 85.3 | 81.9   | 79.4   | 78.9   | 79.4   | 79.6   | 82.2  | 2.7     | 0.2  |
| C2   | Q    | 117.7  | 107.2  | 95.2   | 107.2  | 105.9  | 90.1  | -17.2   | 0.1  |
| C2'  | Q    | 114.7  | 104.7  | 92.6   | 104.7  | 103.5  | 90.1  | -14.7   | 0.1  |
| C3   | Q    | 113.3  | 116.6  | 123.7  | 116.6  | 116.4  | 114.4 | -2.6    | 0.4  |
| C3'  | Q    | 114.9  | 118.7  | 126.5  | 118.7  | 118.3  | 114.5 | -4.5    | 0.4  |
| C4   | 214  | 268.0  | 234.5  | 201.2  | 234.5  | 227.9  | 149.7 | -86.3   | 1.5  |
| C4'  | 202  | 255.3  | 225.0  | 193.7  | 225.0  | 219.2  | 149.9 | -76.7   | 1.6  |
| C5   | ND   | 1614.5 | 1284.1 | 1006.8 | 1284.1 | 1194.9 | 131.6 | -1153.8 | 1.3  |
| C5'  | ND   | 1589.5 | 1271.0 | 1002.2 | 1271.0 | 1182.9 | 131.6 | -1140.9 | 1.5  |
| C6   | Q    | 18.2   | 106.4  | 171.3  | 106.4  | 112.2  | 181.2 | 71.0    | 3.8  |
| C6'  | Q    | 22.9   | 102.1  | 159.1  | 102.1  | 108.2  | 180.6 | 74.2    | 4.2  |
| C7   | Q    | 22.8   | 42.6   | 87.9   | 42.6   | 49.0   | 125.7 | 80.9    | 2.3  |
| C7'  | Q    | 23.1   | 47.2   | 95.0   | 47.2   | 53.2   | 125.8 | 76.3    | 2.4  |
| C8   | 101  | 138.5  | 113.9  | 97.0   | 113.9  | 116.7  | 150.2 | 35.2    | 1.1  |
| C8'  | 101  | 150.6  | 120.8  | 100.0  | 120.8  | 123.1  | 150.8 | 28.9    | 1.2  |
| C9   | ND   | 586.9  | 416.1  | 263.5  | 416.1  | 397.3  | 173.0 | -248.7  | 5.6  |
| C9'  | ND   | 491.7  | 323.1  | 177.3  | 323.1  | 311.5  | 173.9 | -155.3  | 6.1  |
| C10  | ND   | -239.3 | -276.5 | -281.1 | -276.5 | -249.3 | 75.1  | 348.8   | 2.8  |
| C10' | ND   | -244.2 | -279.8 | -281.8 | -279.8 | -253.1 | 65.5  | 342.6   | 2.8  |
| C11  | 33.1 | 27.4   | 34.6   | 44.5   | 34.6   | 34.7   | 35.6  | 1.3     | -0.3 |
| C11' | ~240 | 259.3  | 241.0  | 211.8  | 241.0  | 224.4  | 26.5  | -215.6  | 1.1  |
| C12  | 33.1 | 36.3   | 31.1   | 26.6   | 31.1   | 30.9   | 27.9  | -3.2    | 0.0  |
| C12' | 7.8  | 1.0    | 1.5    | 1.9    | 1.5    | 2.9    | 20.3  | 18.6    | 0.2  |

ND – not detected signal, Q - quaternary carbon

**Table S3:** Results achieved in repeating application of **P-Cu-L1** as heterogeneous catalyst of styrene oxidation.

|                       | Styrene conversion [%] | Selectivity [%] |              |
|-----------------------|------------------------|-----------------|--------------|
|                       |                        | Styrene oxide   | Benzaldehyde |
| 1 <sup>st</sup> cycle | 80                     | 41              | 40           |
| 2 <sup>nd</sup> cycle | 88                     | 30              | 53           |
| 3 <sup>rd</sup> cycle | 96                     | 18              | 51           |
